# Supplementary material for: COVID-19 Vaccine Literacy of Family Carers for Their Older Parents in Japan
Source: MDPI journal article supplement (doi:10.3390/healthcare9081038), 2021-08-12
Supplement: s1 [file s1]

## Supplementary Materials

**Supplementary Table S1.** Regression results from multivariable regression.

| Dependent variable: Difference between Vaccine Literacy and Health Literacy                             |       |                 |                      |      |
|---------------------------------------------------------------------------------------------------------|-------|-----------------|----------------------|------|
|                                                                                                         | Coef. | <i>p</i> -value | [95% Conf. Interval] |      |
| Age                                                                                                     | −0.01 | 0.01            | −0.02                | 0.00 |
| Gender (Woman = 1; Man = 0)                                                                             | 0.03  | 0.60            | −0.09                | 0.15 |
| Marital status (Married = 1; Other = 0)                                                                 | −0.04 | 0.61            | −0.18                | 0.11 |
| Children (Yes = 1; No = 0)                                                                              | 0.14  | 0.04            | 0.01                 | 0.28 |
| Household Income (Yen 10,000 per year)                                                                  | 0.00  | 0.37            | 0.00                 | 0.00 |
| Education level (% college or higher education)                                                         |       |                 |                      |      |
| 2                                                                                                       | 0.20  | 0.32            | −0.19                | 0.59 |
| 3                                                                                                       | 0.31  | 0.16            | −0.12                | 0.74 |
| 4                                                                                                       | 0.18  | 0.39            | −0.23                | 0.58 |
| 5                                                                                                       | 0.31  | 0.11            | −0.08                | 0.70 |
| 6                                                                                                       | 0.09  | 0.70            | −0.36                | 0.54 |
| 7                                                                                                       | 0.41  | 0.29            | −0.35                | 1.16 |
| Employment (% full-time not taking care leave)                                                          |       |                 |                      |      |
| 2                                                                                                       | −0.09 | 0.34            | −0.27                | 0.09 |
| 3                                                                                                       | −0.18 | 0.44            | −0.65                | 0.28 |
| Parents care needs (% with lighter need: support at levels 1 or 2, or care at level 1 on 5-point scale) |       |                 |                      |      |
| 2                                                                                                       | 0.11  | 0.12            | −0.03                | 0.26 |
| 3                                                                                                       | 0.00  | 0.99            | −0.15                | 0.15 |
| 4                                                                                                       | −0.02 | 0.85            | −0.22                | 0.18 |
| 5                                                                                                       | −0.13 | 0.25            | −0.35                | 0.09 |
| 6                                                                                                       | 0.04  | 0.73            | −0.20                | 0.29 |
| Distance from home to parents home: % living together or within walking distance                        |       |                 |                      |      |
| 2                                                                                                       | −0.11 | 0.22            | −0.28                | 0.06 |
| 3                                                                                                       | 0.02  | 0.77            | −0.13                | 0.17 |
| 4                                                                                                       | −0.07 | 0.42            | −0.26                | 0.11 |
| 5                                                                                                       | −0.04 | 0.73            | −0.29                | 0.20 |
| 6                                                                                                       | 0.08  | 0.45            | −0.13                | 0.30 |
| Care provided to parent (hours per week)                                                                | 0.01  | 0.00            | 0.00                 | 0.02 |
| Constant                                                                                                | −0.01 | 0.97            | −0.51                | 0.49 |

**Supplementary Table S2.** Regression results from single-variable regressions.

| Dependent variable: Difference between Vaccine Literacy and Health Literacy                                |                |                 |                      |      |
|------------------------------------------------------------------------------------------------------------|----------------|-----------------|----------------------|------|
|                                                                                                            | Crude<br>Coef. | <i>p</i> -value | [95% Conf. Interval] |      |
| Age                                                                                                        | −0.01          | 0.00            | −0.01                | 0.00 |
| Gender (Woman = 1; Man = 0)                                                                                | 0.03           | 0.60            | −0.08                | 0.14 |
| Marital status (Married = 1; Other = 0)                                                                    | −0.09          | 0.13            | −0.20                | 0.03 |
| Children (Yes = 1; No = 0)                                                                                 | 0.16           | 0.77            | −0.09                | 0.13 |
| Household Income (Yen 10,000 per year)                                                                     | 0.00           | 0.85            | 0.00                 | 0.00 |
| Education level (% college or higher education)                                                            |                |                 |                      |      |
| 2                                                                                                          | 0.26           | 0.19            | −0.13                | 0.65 |
| 3                                                                                                          | 0.37           | 0.08            | −0.05                | 0.79 |
| 4                                                                                                          | 0.29           | 0.15            | −0.11                | 0.69 |
| 5                                                                                                          | 0.41           | 0.04            | 0.03                 | 0.79 |
| 6                                                                                                          | 0.20           | 0.37            | −0.24                | 0.65 |
| 7                                                                                                          | 0.46           | 0.22            | −0.28                | 1.21 |
| Employment (% full-time not taking care leave)                                                             |                |                 |                      |      |
| 2                                                                                                          | −0.09          | 0.34            | −0.26                | 0.09 |
| 3                                                                                                          | −0.10          | 0.66            | −0.57                | 0.36 |
| Parents care needs (% with lighter need: support at levels 1 or 2, or<br>care at level 1 on 5-point scale) |                |                 |                      |      |
| 2                                                                                                          | 0.15           | 0.05            | 0.00                 | 0.29 |
| 3                                                                                                          | 0.05           | 0.53            | −0.10                | 0.20 |
| 4                                                                                                          | 0.02           | 0.82            | −0.17                | 0.22 |
| 5                                                                                                          | −0.06          | 0.57            | −0.28                | 0.15 |
| 6                                                                                                          | 0.15           | 0.23            | −0.10                | 0.40 |
| Distance from home to parents home: % living together or within<br>walking distance                        |                |                 |                      |      |
| 2                                                                                                          | −0.10          | 0.09            | −0.27                | 0.07 |
| 3                                                                                                          | 0.01           | 0.07            | −0.13                | 0.16 |
| 4                                                                                                          | −0.07          | 0.09            | −0.25                | 0.10 |
| 5                                                                                                          | −0.04          | 0.12            | −0.29                | 0.20 |
| 6                                                                                                          | 0.02           | 0.11            | −0.19                | 0.24 |
| Care provided to parent (hours per week)                                                                   | 0.01           | 0.00            | 0.01                 | 0.02 |
